# Supplementary material
Source: publisher figshare collection journal article supplement (https://acs.figshare.com/ndownloader/files/22209885)
Supplement: Supplementary file 1 [file 22209885]

## Supporting Information

### Production of squalene in *Bacillus subtilis* by squalene synthases screening and metabolic engineering

Yafeng Song<sup>1</sup>, Zheng Guan<sup>1</sup>, Ronald van Merkerk<sup>1</sup>, Hegar Pramastya<sup>1,2</sup>, Ingy I. Abdallah<sup>1,3</sup>,  
Rita Setroikromo<sup>1</sup>, Wim J. Quax<sup>1,\*</sup>

<sup>1</sup>Department of Chemical and Pharmaceutical Biology, Groningen Research Institute of Pharmacy, University of Groningen, Antonius Deusinglaan 1, 9713 AV Groningen, The Netherlands

<sup>2</sup>Pharmaceutical Biology Research Group, School of Pharmacy, Institut Teknologi Bandung, 40132, Bandung, Indonesia

<sup>3</sup>Department of Pharmacognosy, Faculty of Pharmacy, Alexandria University, Egypt

**\*Corresponding author:** Prof. Dr. Wim J. Quax

**Table S1** Plasmids used in this study

**Table S2** Strains used in this study

**Table S3** Oligonucleotides used in this study

**Table S4** Sequence alignment result of squalene synthase (SQS)/HpnC from different species

**Figure S1** Analysis of the secondary structures of SQSs

**Figure S2** Sequence alignment of the squalene synthase candidates from different species

**Figure S3** Biosynthesis pathway of squalene

**Figure S4** Effect of incubation temperature on the activity of crude SQS extracts

**Figure S5** *In vitro* relative activity of crude SQS extracts

**Figure S6** Effect of different combinations of MEP pathway genes in pBS0E plasmid on squalene production in *Bacillus subtilis* cultured 48 hours at 25°C

## Materials and methods

### GC-MS assay for catalytic activities of different crude SQS extracts

An in-vitro GC-MS assay was conducted to determine the catalytic activities of crude SQS enzymes. *B. subtilis* strains DBA, DBM, DPG and DSC, which contain the genes encoding respectively BaSQS, BmSQS, PgSQS, and ScSQS in the genome, were used to determine the catalytic activities of crude SQS extracts. Culture samples (1mL) were harvested after the *B. subtilis* strains had been cultured at 25°C for 48 hours to obtain cell pellets. Then the cell pellets were lysed by lysis buffer (50µl lysis buffer per OD<sub>600</sub>) containing: 50mM glucose, 25mM Tris-HCl (pH 8.0), 0.25mg/mL lysozyme, DNase 0.01%, 2mM DTT, 1 cOmplete protease inhibitor (1 tablet per 50mL); and incubated for 1 hour at 37°C. Then the supernatants were separated from the lyses by centrifugation (13000rpm, 10 min) and served as the crude enzyme extracts. For 0.5mL reaction of each sample containing crude extract enzymes 50µL in 10mM Tris-HCl buffer (pH 7.4), containing 10mM Mg<sup>2+</sup>, 2mM DTT, 1 mM NADPH, and 46µM FPP substrate. The reaction samples were incubated at 30°C (if not indicated otherwise) for 2 hours and stopped by addition of equal volume of cold methanol and 200µL of ethyl acetate containing cholesterol as internal standard. Then the reaction samples were centrifuged at 13000rpm for 2 minutes to obtain the supernatants. The supernatants were subsequently dried under nitrogen and dissolved in 100 µL of isopropanol (IPA)-acetonitrile (ACN) (7:3, v/v). Then samples were sent for GC-MS analysis.

**Table S1 Plasmids used in this study.**

| Plasmids       | Genotype and/or relevant characteristics                                                                                                                     | Sources/Reference |
|----------------|--------------------------------------------------------------------------------------------------------------------------------------------------------------|-------------------|
| pHCMC04G       | <i>B. subtilis</i> and <i>E. coli</i> shuttle vector; ori-pBR322; ori-pBS72; P <sub>xyIA</sub> xylose-inducible promoter; Cm <sup>R</sup> ; Amp <sup>R</sup> | 1                 |
| pHCMC04G-BaSQS | pHCMC04G derivative, squalene synthase originated from <i>Bacillus acidocaldarius</i>                                                                        | This work         |
| pHCMC04G-BmSQS | pHCMC04G derivative, squalene synthase originated from <i>Bacillus megaterium</i>                                                                            | This work         |
| pHCMC04G-PgSQS | pHCMC04G derivative, squalene synthase originated from <i>Panax ginseng</i>                                                                                  | This work         |
| pHCMC04G-ScSQS | pHCMC04G derivative, squalene synthase originated from <i>Saccharomyces cerevisiae</i>                                                                       | This work         |
| pHY300PLK      | <i>B. subtilis</i> and <i>E. coli</i> shuttle vector; ori-pACYC17; ori-pAMα1; Tc <sup>R</sup> ; Amp <sup>R</sup>                                             | 2                 |
| pHY-BmSQS      | pHY300PLK derivative, squalene synthase originated from <i>Bacillus megaterium</i>                                                                           | This work         |
| pHY-PgSQS      | pHY300PLK derivative, squalene synthase originated from <i>Panax ginseng</i>                                                                                 | This work         |
| pHY-ScSQS      | pHY300PLK derivative, squalene synthase originated from <i>Saccharomyces cerevisiae</i>                                                                      | This work         |
| pDR111         | <i>B. subtilis</i> integration vector; ori-pBR322; P <sub>hyperspank</sub> IPTG-inducible promoter; Spe <sup>R</sup> ; Amp <sup>R</sup>                      | 3                 |

|                   |                                                                                                                                                                                               |           |
|-------------------|-----------------------------------------------------------------------------------------------------------------------------------------------------------------------------------------------|-----------|
| pDR111-BaSQS      | pDR111 derivative, squalene synthase originated from <i>Bacillus acidocaldarius</i>                                                                                                           | This work |
| pDR111-BmSQS      | pDR111 derivative, squalene synthase originated from <i>Bacillus megaterium</i>                                                                                                               | This work |
| pDR111-PgSQS      | pDR111 derivative, squalene synthase originated from <i>Panax ginseng</i>                                                                                                                     | This work |
| pDR111-ScSQS      | pDR111 derivative, squalene synthase originated from <i>Saccharomyces cerevisiae</i>                                                                                                          | This work |
| pHB201            | <i>B. subtilis</i> and <i>E. coli</i> shuttle vector; ori-pUC19; ori-pTA1060 (rolling circle replication); P59 constitutive promoter; <i>cat86::lacZα</i> ; Cm <sup>R</sup> ; Em <sup>R</sup> | 1         |
| pHCMC04G-SDFH     | pHCMC04G derivative, <i>dxs</i> , <i>ispD</i> , <i>ispF</i> , <i>ispH</i>                                                                                                                     | 1         |
| pHCMC04G-CEGA     | pHCMC04G derivative, <i>ispC</i> , <i>ispE</i> , <i>ispG</i> , <i>ispA</i>                                                                                                                    | 1         |
| pHCMC04G-SDFHCEGA | pHCMC04G derivative, <i>dxs</i> , <i>ispD</i> , <i>ispF</i> , <i>ispH</i> , <i>ispC</i> , <i>ispE</i> , <i>ispG</i> , <i>ispA</i>                                                             | 4         |
| pBS0E             | <i>B. subtilis</i> and <i>E. coli</i> shuttle vector; ori-1030 (theta replication); P <sub>xyL4</sub> xylose-inducible promoter; Erm <sup>R</sup> ; Amp <sup>R</sup>                          | 5         |
| pBS0E-SDFH        | pBS0E derivative, <i>dxs</i> , <i>ispD</i> , <i>ispF</i> , <i>ispH</i>                                                                                                                        | This work |
| pBS0E-SDFHC       | pBS0E derivative, <i>dxs</i> , <i>ispD</i> , <i>ispF</i> , <i>ispH</i> , <i>ispC</i>                                                                                                          | This work |
| pBS0E-SDFHE       | pBS0E derivative, <i>dxs</i> , <i>ispD</i> , <i>ispF</i> , <i>ispH</i> , <i>ispE</i>                                                                                                          | This work |
| pBS0E-SDFHG       | pBS0E derivative, <i>dxs</i> , <i>ispD</i> , <i>ispF</i> , <i>ispH</i> , <i>ispG</i>                                                                                                          | This work |
| pBS0E-SDFHA       | pBS0E derivative, <i>dxs</i> , <i>ispD</i> , <i>ispF</i> , <i>ispH</i> , <i>ispA</i>                                                                                                          | This work |

**Table S2 Strains used in this study**

| Strains                | Genotype and/or relevant characteristics                                                           | Sources   |
|------------------------|----------------------------------------------------------------------------------------------------|-----------|
| <i>B. subtilis</i> 168 | <i>trpC2</i>                                                                                       | Lab stock |
| BC                     | <i>B. subtilis</i> 168 derivative, pHCMC04G, Cm <sup>R</sup>                                       | This work |
| BA                     | <i>B. subtilis</i> 168 derivative, pHCMC04G-BaSQS, Cm <sup>R</sup>                                 | This work |
| BM                     | <i>B. subtilis</i> 168 derivative, pHCMC04G-BmSQS, Cm <sup>R</sup>                                 | This work |
| PG                     | <i>B. subtilis</i> 168 derivative, pHCMC04G-PgSQS, Cm <sup>R</sup>                                 | This work |
| SC                     | <i>B. subtilis</i> 168 derivative, pHCMC04G-ScSQS, Cm <sup>R</sup>                                 | This work |
| HBM                    | <i>B. subtilis</i> 168 derivative, pHY-BmSQS, Tet <sup>R</sup>                                     | This work |
| HPG                    | <i>B. subtilis</i> 168 derivative, pHY-PgSQS, Tet <sup>R</sup>                                     | This work |
| HSC                    | <i>B. subtilis</i> 168 derivative, pHY-ScSQS, Tet <sup>R</sup>                                     | This work |
| DBA                    | <i>B. subtilis</i> 168 derivative, pDR111-BaSQS, Spe <sup>R</sup>                                  | This work |
| DBM                    | <i>B. subtilis</i> 168 derivative, pDR111-BmSQS, Spe <sup>R</sup>                                  | This work |
| DPG                    | <i>B. subtilis</i> 168 derivative, pDR111-PgSQS, Spe <sup>R</sup>                                  | This work |
| DSC                    | <i>B. subtilis</i> 168 derivative, pDR111-ScSQS, Spe <sup>R</sup>                                  | This work |
| DBA-MEP4               | <i>B. subtilis</i> 168 derivative, pDR111-BaSQS, pHCMC04G-SDFH, Spe <sup>R</sup> , Cm <sup>R</sup> | This work |
| DBM-MEP4               | <i>B. subtilis</i> 168 derivative, pDR111-BmSQS, pHCMC04G-SDFH, Spe <sup>R</sup> , Cm <sup>R</sup> | This work |
| DPG-MEP4               | <i>B. subtilis</i> 168 derivative, pDR111-PgSQS, pHCMC04G-SDFH, Spe <sup>R</sup> , Cm <sup>R</sup> | This work |

|                      |                                                                                                                                              |           |
|----------------------|----------------------------------------------------------------------------------------------------------------------------------------------|-----------|
| DSC-MEP4             | <i>B. subtilis</i> 168 derivative, pDR111-ScSQS, pHCMC04G-SDFH, Spe <sup>R</sup> , Cm <sup>R</sup>                                           | This work |
| DBA-MEP8             | <i>B. subtilis</i> 168 derivative, pDR111-BaSQS, pHCMC04G-SDFHCEGA, Spe <sup>R</sup> , Cm <sup>R</sup>                                       | This work |
| DBM-MEP8             | <i>B. subtilis</i> 168 derivative, pDR111-BmSQS, pHCMC04G-SDFHCEGA, Spe <sup>R</sup> , Cm <sup>R</sup>                                       | This work |
| DPG-MEP8             | <i>B. subtilis</i> 168 derivative, pDR111-PgSQS, pHCMC04G-SDFHCEGA, Spe <sup>R</sup> , Cm <sup>R</sup>                                       | This work |
| DSC-MEP8             | <i>B. subtilis</i> 168 derivative, pDR111-ScSQS, pHCMC04G-SDFHCEGA, Spe <sup>R</sup> , Cm <sup>R</sup>                                       | This work |
| DBM-ESDFH            | <i>B. subtilis</i> 168 derivative, pDR111-BmSQS, pBS0E-SDFH, Spe <sup>R</sup> , Erm <sup>R</sup>                                             | This work |
| DPG-ESDFH            | <i>B. subtilis</i> 168 derivative, pDR111-PgSQS, pBS0E-SDFH, Spe <sup>R</sup> , Erm <sup>R</sup>                                             | This work |
| DSC-ESDFH            | <i>B. subtilis</i> 168 derivative, pDR111-ScSQS, pBS0E-SDFH, Spe <sup>R</sup> , Erm <sup>R</sup>                                             | This work |
| DBM-ESDFHC           | <i>B. subtilis</i> 168 derivative, pDR111-BmSQS, pBS0E-SDFHC, Spe <sup>R</sup> , Erm <sup>R</sup>                                            | This work |
| DPG-ESDFHC           | <i>B. subtilis</i> 168 derivative, pDR111-PgSQS, pBS0E-SDFHC, Spe <sup>R</sup> , Erm <sup>R</sup>                                            | This work |
| DSC-ESDFHC           | <i>B. subtilis</i> 168 derivative, pDR111-ScSQS, pBS0E-SDFHC, Spe <sup>R</sup> , Erm <sup>R</sup>                                            | This work |
| DBM-ESDFHE           | <i>B. subtilis</i> 168 derivative, pDR111-BmSQS, pBS0E-SDFHE, Spe <sup>R</sup> , Erm <sup>R</sup>                                            | This work |
| DPG-ESDFHE           | <i>B. subtilis</i> 168 derivative, pDR111-PgSQS, pBS0E-SDFHE, Spe <sup>R</sup> , Erm <sup>R</sup>                                            | This work |
| DSC-ESDFHE           | <i>B. subtilis</i> 168 derivative, pDR111-ScSQS, pBS0E-SDFHE, Spe <sup>R</sup> , Erm <sup>R</sup>                                            | This work |
| DBM-ESDFHG           | <i>B. subtilis</i> 168 derivative, pDR111-BmSQS, pBS0E-SDFHG, Spe <sup>R</sup> , Erm <sup>R</sup>                                            | This work |
| DPG-ESDFHG           | <i>B. subtilis</i> 168 derivative, pDR111-PgSQS, pBS0E-SDFHG, Spe <sup>R</sup> , Erm <sup>R</sup>                                            | This work |
| DSC-ESDFHG           | <i>B. subtilis</i> 168 derivative, pDR111-ScSQS, pBS0E-SDFHG, Spe <sup>R</sup> , Erm <sup>R</sup>                                            | This work |
| DBM-ESDFHA           | <i>B. subtilis</i> 168 derivative, pDR111-BmSQS, pBS0E-SDFHA, Spe <sup>R</sup> , Erm <sup>R</sup>                                            | This work |
| DPG-ESDFHA           | <i>B. subtilis</i> 168 derivative, pDR111-PgSQS, pBS0E-SDFHA, Spe <sup>R</sup> , Erm <sup>R</sup>                                            | This work |
| DSC-ESDFHA           | <i>B. subtilis</i> 168 derivative, pDR111-ScSQS, pBS0E-SDFHA, Spe <sup>R</sup> , Erm <sup>R</sup>                                            | This work |
| <i>E. coli</i> turbo | F' <i>proA B lacI<sup>q</sup> ΔlacZM15 / fhuA2 Δ(lac proAB) glnV galK16 galE15 R(zgb 210::Tn10)Tet<sup>S</sup> endA1 thi-1 Δ(hsdS-mcrB)5</i> | Lab stock |

**Table S3 Oligonucleotides used in this study**

| Name   | Sequences                                                            |
|--------|----------------------------------------------------------------------|
| Ba-F   | gacaaatggtccaaactagtgataagaggaggagaaatatgggctcagttccggtgaactgag      |
| Ba-R   | catttccccctttgatttttagattcagtgatgatgatgatgtgctgatccgccttcgccttttgc   |
| Bm-F   | gacaaatggtccaaactagtgataagaggaggagaaatatgagcgtccgaataaaactgcgcg      |
| Bm-R   | catttccccctttgatttttagattcagtgatgatgatgatgatgcatatcgacgacttcattgactg |
| Pg-F   | gacaaatggtccaaactagtgataagaggaggagaaatatgggctcacttggcgcaattctgaaac   |
| Pg-R   | catttccccctttgatttttagattcagtgatgatgatgatgatgtgcgctattatggcctgattcgc |
| Sc-F   | gacaaatggtccaaactagtgataagaggaggagaaatatgggcaaactgctgcaactggcactg    |
| Sc-R   | catttccccctttgatttttagattcagtgatgatgatgatgatgtttgtactcttcttctgtgtgtc |
| SQS-F2 | gggaaatgacaaatggtccaaactagtgataagaggaggagaaatatg                     |

|           |                                                            |
|-----------|------------------------------------------------------------|
| 04-SQS-S  | cattgaaataaacattttttgtatatgatgagataaagttag                 |
| 04-SQS-A  | cctaataagccgatattagcctcgtatg                               |
| CO-SDFH-S | ccatttgtttaacttttaataagtagtaacatagtag                      |
| CO-SDFH-A | gattcattaatgcagctggcacgac                                  |
| HYV-F     | actagtcctctcttacggatcccc                                   |
| HYV-R     | gggagtagtctaagagaaagatgtgag                                |
| HYBm-F    | ggggatccgtaagagaggactagtagcgttccgaataaactgcgcg             |
| HYBm-R    | cacatctttctcttagactactccctcagtgatgatgatgatgcataatcg        |
| HYPg-F    | ctcacatctttctcttagactactccctcagtgatgatgatgatgtgcgc         |
| HYPg-R    | ggggatccgtaagagaggactagtagggctcacttggcgcaattctg            |
| HYSf-F    | ctcacatctttctcttagactactccctcagtgatgatgatgatgtttgtac       |
| HYSf-R    | cggggatccgtaagagaggactagtagggcaactgctgcaactggcac           |
| DRV-F     | taataatgagcactagtagcaaggtcggc                              |
| DRV-R     | gtttgtcctccttattagtaatacagctagc                            |
| DRBa-F    | gccgaccttgactagtgctcattattagtgatgatgatgatgtgctgatccg       |
| DRBa-R    | gctgattaactaataaggaggacaaacatgggctcagttccggtgaactgagag     |
| DRBm-F    | gccgaccttgactagtgctcattattagtgatgatgatgatgcataatcgacg      |
| DRBm-R    | gctgattaactaataaggaggacaaacatgagcgttccgaataaactgcgcgataatg |
| DRPg-F    | gctgattaactaataaggaggacaaacatgggctcacttggcgcaattctgaaac    |
| DRPg-R    | gccgaccttgactagtgctcattattagtgatgatgatgatgtgctgctattatg    |
| DRSc-F    | gccgaccttgactagtgctcattattagtgatgatgatgatgtttgtactcttc     |
| DRSc-R    | gctgattaactaataaggaggacaaacatgggcaactgctgcaactggcactg      |
| DRGV-F    | catcatcatcatcactaataatgagcactagtc                          |
| DRGV-R    | gccagaaccgctttatacaattcatc                                 |
| HY-SQS-S  | cctatggaagttgatcagcaacttatctg                              |
| HY-SQS-A  | gcatgcgcaaccagttagatatgc                                   |
| DR-SQS-S  | gcacgaaaaaagcaccataagg                                     |
| DR-SQS-A  | gccgcgtttcgggtgatgaagatc                                   |
| DR-GSQS-S | gcacgaaaaaagcaccataagg                                     |
| DR-GSQS-A | gatgggtccagttttgttgccag                                    |
| ESDFHV-F  | gtttttgtctttacttttgaagtattttttg                            |
| ESDFHV-R  | cactagtagcggccgctgcaggca                                   |
| ESDFH-F2  | caaaaaataacttccaaaagtaaaagcaaaaaactaacgcaagaggaggagaaat    |
| ESDFHC-F  | gtaaaagcaaaaaactaacgcaagaggaggagaaatatgaaaaatattgtcttttag  |
| ESDFHC-R  | gcatgcctgcagcggccgctactagtggtgtagtattgaattgacgtatccccg     |
| ESDFHE-F  | gtaaaagcaaaaaactaacgcaagaggaggagaaatatgctgattttgaaaaagc    |
| ESDFHE-R  | tgctgcagcggccgctactagtgatcaagagcgttctgttcgccgatc           |
| ESDFHG-F  | gtaaaagcaaaaaactaacgcaagaggaggagaaatatgcaagttagtgaaatc     |
| ESDFHG-R  | atgcctgcagcggccgctactagtgagctttttgtttctcttttaattttgc       |
| ESDFHA-F  | aaaagcaaaaaactaacgcaagaggaggagaaatatgacaaataaataacgagc     |
| ESDFHA-R  | catgcctgcagcggccgctactagtggtgatctcttgcgcaattaaatcac        |
| ESDFH-S   | caggctttacactttatgcttccgg                                  |
| ESDFH-A   | gcagtttgatcacgaagatccatc                                   |

**Table S4 Sequence alignment result of squalene synthase (SQS)/HpnC from different species**

| Subject                        | Query                                        | Identity (%) |
|--------------------------------|----------------------------------------------|--------------|
| <i>Bacillus acidocaldarius</i> | SQS from <i>Homo sapiens</i>                 | 12.2         |
| <i>Bacillus acidocaldarius</i> | SQS from <i>Methylococcus capsulatus</i>     | 17.3         |
| <i>Bacillus acidocaldarius</i> | SQS from <i>Bacillus megaterium</i>          | 16.4         |
| <i>Bacillus acidocaldarius</i> | SQS from <i>Panax ginseng</i>                | 12.8         |
| <i>Bacillus acidocaldarius</i> | SQS from <i>Saccharomyces cerevisiae</i>     | 13.5         |
| <i>Bacillus acidocaldarius</i> | HpnC from <i>Rhodospseudomonas Palustris</i> | 24.9         |
| <i>Bacillus acidocaldarius</i> | HpnC from <i>Zymomonas mobilis</i>           | 27.5         |

**Figure S1**

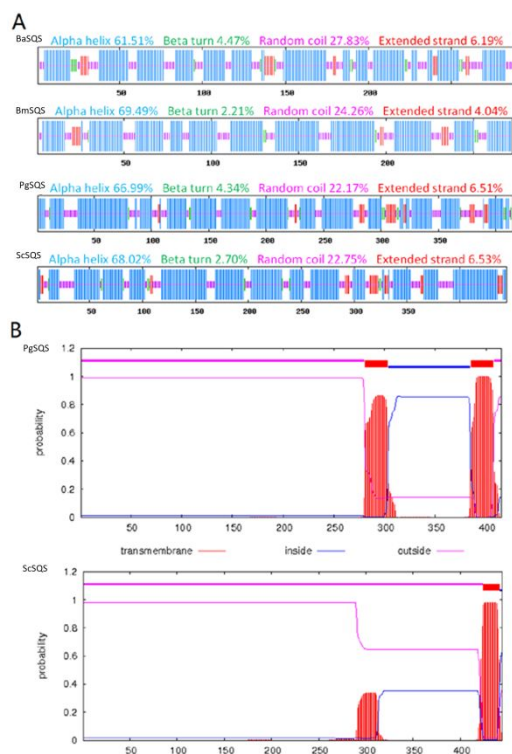

**Figure S1** Analysis of the secondary structures of SQSs. **A.** Annotation of the secondary structures of SQS using SOPMA online server ([https://npsa-prabi.ibcp.fr/cgi-bin/npsa\\_automat.pl?page=npsa\\_sopma.html](https://npsa-prabi.ibcp.fr/cgi-bin/npsa_automat.pl?page=npsa_sopma.html)). **B.** The predicted transmembrane regions of SQS using TMHMM Server (v. 2.0) (<http://www.cbs.dtu.dk/services/TMHMM/>). PgSQS, ScSQS, and HsSQS represents squalene synthase originating from *Panax ginseng*, *Saccharomyces cerevisiae*, and *Homo sapiens*, respectively.

**Figure S2**

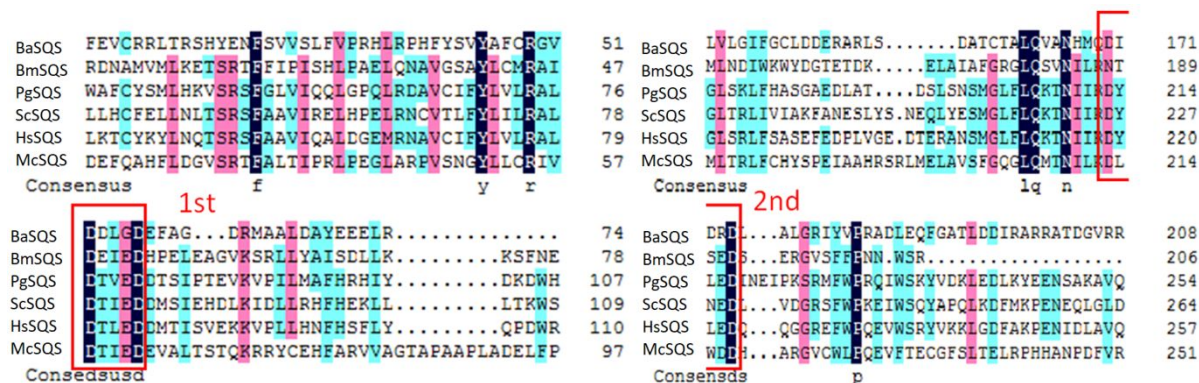

**Figure S2** Sequence alignment of the squalene synthase candidates from different species. 1st and 2nd represent two conserved (predicted) aspartate-rich motifs “DxxxD”. BaSQS, BmSQS,

PgSQS, ScSQS, HsSQS, and McSQS represents squalene synthase originating from *Bacillus acidocaldarius*, *Bacillus megaterium*, *Panax ginseng*, *Saccharomyces cerevisiae*, *Homo sapiens* and *Methylococcus capsulatus*, respectively.

**Figure S3**

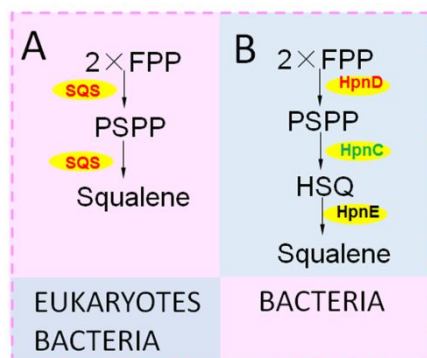

**Figure S3** Biosynthesis pathway of squalene. **A:** Conversion of FPP to squalene in a two steps/one enzyme reaction by eukaryotic squalene synthase or bacterial squalene synthase, such as *Homo sapiens* and *Methylococcus capsulatus*. **B:** Conversion of FPP to squalene in three steps/two enzymes reaction by bacterial squalene synthase from *Zymomonas mobilis* and *Rhodopseudomonas Palustris*. SQS: squalene synthase; FPP, Farnesyl pyrophosphate; PSPP: Presqualene pyrophosphate; HSQ: hydroxysqualene.

**Figure S4**

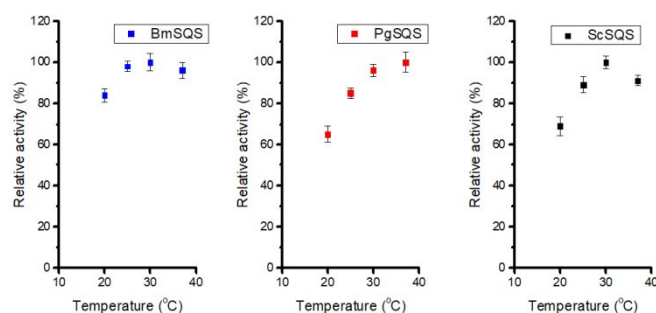

**Figure S4** Effect of incubation temperature on the activity of crude SQS extracts. The crude enzyme extracts were prepared after the *B. subtilis* strains had been cultured 48 h at 25°C. The *in vitro* reaction samples were incubated for 2 hours at 20°C, 25 °C, 30 °C and 37 °C, respectively. Error bars represent standard deviations of biological triplicates. Strains DBM, DPG and DSC, which contain the genes encoding respectively BmSQS, PgSQS, and ScSQS in the genome, were tested. BmSQS, PgSQS, and ScSQS are squalene synthases originating from *Bacillus megaterium*, *Panax ginseng* and *Saccharomyces cerevisiae*, respectively.

**Figure S5**

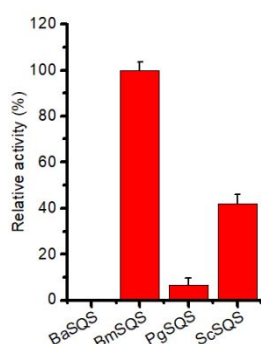

**Figure S5** *In vitro* relative activity of crude SQS extracts. The crude enzyme extracts were prepared after the *B. subtilis* strains had been cultured 48 h at 25°C. The *in vitro* reaction samples were incubated at 30°C for 2 hours. Error bars represent standard deviations of biological triplicates. Strains DBA, DBM, DPG and DSC, which contain the genes encoding respectively BaSQS, BmSQS, PgSQS, and ScSQS in the genome, were tested. BaSQS, BmSQS, PgSQS, and ScSQS are squalene synthases originating from *Bacillus acidocaldarius*, *Bacillus megaterium*, *Panax ginseng* and *Saccharomyces cerevisiae*, respectively.

**Figure S6**

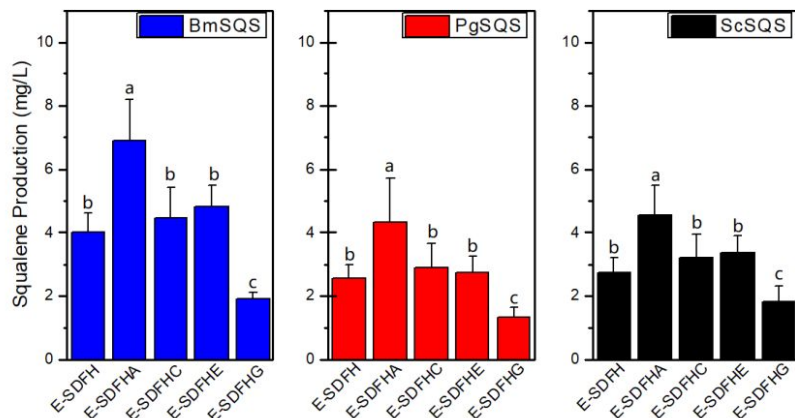

**Figure S6**

Effect of different combinations of MEP pathway genes in pBS0E plasmid on squalene production in *Bacillus subtilis* cultured 48 hours at 25°C. Error bars represent standard deviations of biological triplicates. Different letters indicate significant statistical differences (Scott Knott 5%). MEP pathway related genes were overexpressed in pBS0E. S, C, D, E, F, G and A represents *dxs*, *ispC*, *ispD*, *ispE*, *ispF*, *ispG*, *ispH* and *ispA*, respectively. BmSQS, PgSQS, and ScSQS are squalene synthases originating from *Bacillus megaterium*, *Panax ginseng* and *Saccharomyces cerevisiae*, respectively.



## References

- (1) Xue, D.; Abdallah, II; de Haan, I. E.; Sibbald, M. J.; Quax, W. J., Enhanced C30 carotenoid production in *Bacillus subtilis* by systematic overexpression of MEP pathway genes. *Applied microbiology and biotechnology* 2015, 99, 5907-15.
- (2) Yoshida, K.; Ueda, S.; Maeda, I., Carotenoid production in *Bacillus subtilis* achieved by metabolic engineering. *Biotechnology letters* 2009, 31, 1789-93.
- (3) Overkamp, W.; Beilharz, K.; Detert Oude Weme, R.; Solopova, A.; Karsens, H.; Kovacs, A.; Kok, J.; Kuipers, O. P.; Veening, J. W., Benchmarking various green fluorescent protein variants in *Bacillus subtilis*, *Streptococcus pneumoniae*, and *Lactococcus lactis* for live cell imaging. *Applied and environmental microbiology* 2013, 79, 6481-90.
- (4) Abdallah, II; Pramastya, H.; van Merkerk, R.; Sukrasno; Quax, W. J., Metabolic Engineering of *Bacillus subtilis* Toward Taxadiene Biosynthesis as the First Committed Step for Taxol Production. *Frontiers in microbiology* 2019, 10, 218.
- (5) Popp, P. F.; Dotzler, M.; Radeck, J.; Bartels, J.; Mascher, T., The Bacillus BioBrick Box 2.0: expanding the genetic toolbox for the standardized work with *Bacillus subtilis*. *Scientific reports* 2017, 7, 15058.
